# Supplementary material
Source: bioRxiv or medRxiv preprint supplement (https://medrxiv.org/content/medrxiv/early/2024/05/08/2024.05.06.24306555/DC1/embed/media-1.pdf)
Supplement: Supplementary file [file media-1.pdf]

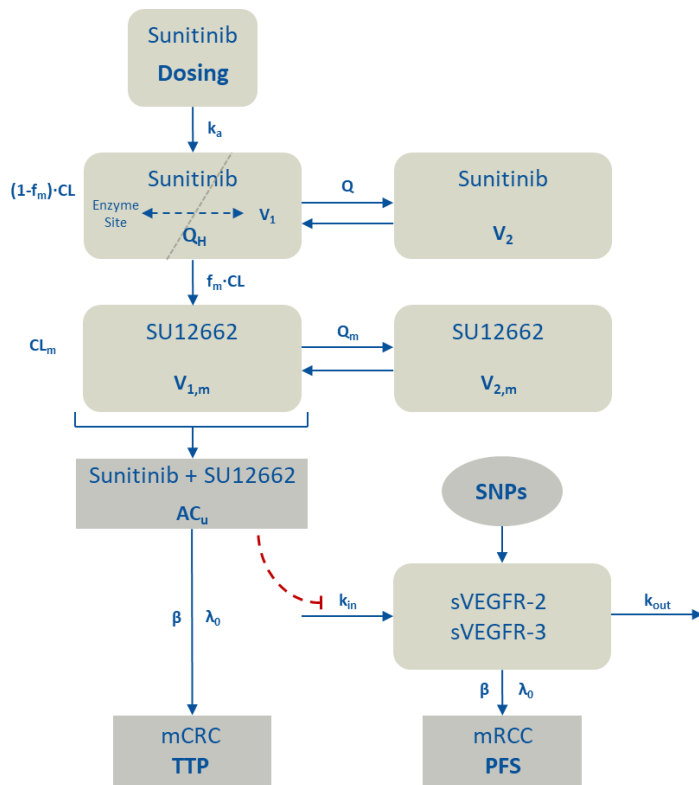

Sunitinib PK/PD model [28]. Use with permission from Achim Fritsch

Abbreviations: AC<sub>u</sub>, unbound active concentration (sunitinib + SU12662);  $\beta$ , regression coefficient; CL<sub>m</sub>, clearance of the metabolite SU12262;  $f_m$ , fraction metabolized to SU12662;  $k_a$ , absorption rate constant;  $k_{in}$ , zero-order release rate constant;  $k_{out}$ , first-order elimination rate constant;  $\lambda_0$ , baseline hazard;  $Q$ , inter-compartmental clearance of sunitinib;  $Q_H$ , liver blood flow;  $Q_m$ , intercompartmental clearance of the metabolite SU12662;  $V_1$ , volume of the central compartment of sunitinib;  $V_{1,m}$ , volume of the central compartment of the metabolite SU12662;  $V_2$ , volume of the peripheral compartment of sunitinib;  $V_{2,m}$  volume of the peripheral compartment of the metabolite SU12662.
